# Supplementary material
Source: PubMed Central journal article supplement (PMC4790609)
Supplement: bise005012.ww1_default.pdf [file bise005012.ww1_default.pdf]

APPENDIX

**Table A. Comparison of Dutch *Living Well with COPD* version and the original Canadian *Living Well with COPD* programme**

|                            | <b>Dutch <i>Living Well with COPD</i> version</b>                                                                                                                                                                                                                                                                                                                                   | <b>Canadian <i>Living Well with COPD</i> version</b>                                                                                                                                                                                                                                                                                                                                                                      |
|----------------------------|-------------------------------------------------------------------------------------------------------------------------------------------------------------------------------------------------------------------------------------------------------------------------------------------------------------------------------------------------------------------------------------|---------------------------------------------------------------------------------------------------------------------------------------------------------------------------------------------------------------------------------------------------------------------------------------------------------------------------------------------------------------------------------------------------------------------------|
| <b>Healthcare setting:</b> | General practice                                                                                                                                                                                                                                                                                                                                                                    | Hospital                                                                                                                                                                                                                                                                                                                                                                                                                  |
| <b>Delivery structure:</b> |                                                                                                                                                                                                                                                                                                                                                                                     |                                                                                                                                                                                                                                                                                                                                                                                                                           |
| Delivery setting           | In general practice                                                                                                                                                                                                                                                                                                                                                                 | At home                                                                                                                                                                                                                                                                                                                                                                                                                   |
| Provider                   | Practice nurses under supervision of GP                                                                                                                                                                                                                                                                                                                                             | Respiratory nurses, respiratory therapists, or physiotherapists under supervision of respiratory physician                                                                                                                                                                                                                                                                                                                |
| Training of provider       | <ul style="list-style-type: none"> <li>• 8-hour group training addressing contents of the Living Well with COPD programme and motivational interviewing;</li> <li>• 1 observation of each practice nurse in daily practice by a respiratory nurse specialized in COPD care;</li> <li>• Coaching through message board on secured web-based application during the study.</li> </ul> | <ul style="list-style-type: none"> <li>• 9-day group training on every aspect of Living well with COPD, theory and practice of all the techniques and patient teaching;</li> <li>• 1 full training day for Exercise module: because most of the healthcare professionals who applied the program were not physiotherapists;</li> <li>• Continuous monitoring and support by a nurse specialized in COPD care .</li> </ul> |
| Patient contacts           | <ul style="list-style-type: none"> <li>• Minimum of 2 to maximum of 4 planned individual sessions of approximately 50 minutes each during 4 to 8 consecutive weeks, followed by;</li> <li>• 6 telephone contacts during 24 months follow-up.</li> </ul>                                                                                                                             | <ul style="list-style-type: none"> <li>• 7-8 weeks of planned individual sessions of approximately 1 hour per week, followed by;</li> <li>• Weekly telephone calls for 8 weeks, followed by;</li> <li>• Monthly telephone calls for the remainder of the 12 month follow-up.</li> </ul>                                                                                                                                   |

|                                                                                                                                         |                                                                                              |                                                                                      |
|-----------------------------------------------------------------------------------------------------------------------------------------|----------------------------------------------------------------------------------------------|--------------------------------------------------------------------------------------|
| <b>Contents of the programme:</b>                                                                                                       |                                                                                              |                                                                                      |
| <i>Educational sessions</i>                                                                                                             |                                                                                              |                                                                                      |
| Module “Preventing your symptoms and taking your medications”                                                                           | Provided to all patients                                                                     | Provided to all patients.                                                            |
| Module “Keeping a healthy and fulfilling lifestyle”                                                                                     | Provided to all patients                                                                     | Provided to all patients                                                             |
| Module “Integrating a plan of action into your life”                                                                                    | Provided to all patients                                                                     | Provided to all patients                                                             |
| Module “Managing your breathing and saving your energy”                                                                                 | Provided to all patients                                                                     | Provided to all patients                                                             |
| Module: “Managing stress & anxiety”                                                                                                     | Provided when appropriate                                                                    | Provided to all patients                                                             |
| Module: “Integrating an exercise program into your life”                                                                                | Provided when appropriate                                                                    | Provided to all patients                                                             |
| Module: “Long-term home oxygen therapy”                                                                                                 | Not provided                                                                                 | Provided when appropriate                                                            |
| <i>Exacerbation action plan</i>                                                                                                         |                                                                                              |                                                                                      |
| Written paper exacerbation action plan                                                                                                  | Standing prescriptions of prednisolone and/or antibiotics depended on the decision of the GP | Standing prescriptions of prednisolone and antibiotics were provided to all patients |
| <i>Exercise programme</i>                                                                                                               |                                                                                              |                                                                                      |
| At home training program with first training under supervision. Patients were encouraged to train 3 times per week for 30 to 45 minutes | Not included                                                                                 | Provided to all patients                                                             |

**Table B. Primary and secondary clinical outcomes: within and between group differences at 6 months #**

| Outcomes                            | Self-management (n=55) |                            | Routine Monitoring (n=55) |                             | Usual care (n=55) |                          | Treatment difference at 6 months |                           |
|-------------------------------------|------------------------|----------------------------|---------------------------|-----------------------------|-------------------|--------------------------|----------------------------------|---------------------------|
|                                     | Baseline               | Change at 6-mo (95% CI)    | Baseline                  | Change at 6-mo (95% CI)     | Baseline          | Change at 6-mo (95% CI)  | SM vs UC                         | RM vs UC                  |
| <b>Primary</b>                      |                        |                            |                           |                             |                   |                          |                                  |                           |
| <b>CRQ Total</b>                    | 5.11<br>(0.94)         | 0.25<br>(0.067 to 0.44)    | 5.10<br>(0.77)            | 0.20<br>(0.014 to 0.38)     | 5.26<br>(0.81)    | 0.23<br>(0.042 to 0.42)  | 0.023<br>(-0.24 to 0.29)         | -0.031<br>(-0.29 to 0.23) |
| <b>Secondary</b>                    |                        |                            |                           |                             |                   |                          |                                  |                           |
| <b>CRQ Emotions</b>                 | 5.13<br>(1.02)         | 0.21<br>(-0.031 to 0.45)   | 5.18<br>(0.91)            | 0.034<br>(-0.21 to 0.28)    | 5.2<br>(1.08)     | 0.27<br>(0.023 to 0.51)  | -0.057<br>(-0.40 to 0.29)        | -0.23<br>(-0.58 to 0.11)  |
| <b>CRQ Mastery</b>                  | 4.75<br>(0.89)         | 0.18<br>(-0.055 to 0.42)   | 4.85<br>(0.77)            | 0.04<br>(-0.20 to 0.28)     | 4.91<br>(0.65)    | 0.16<br>(-0.085 to 0.40) | 0.025<br>(-0.31 to 0.36)         | -0.12<br>(-0.46 to 0.22)  |
| <b>CRQ Fatigue</b>                  | 4.79<br>(1.34)         | 0.38<br>(0.073 to 0.69)    | 4.75<br>(1.18)            | 0.40<br>(0.088 to 0.70)     | 5.04<br>(1.18)    | 0.16<br>(-0.15 to 0.48)  | 0.22<br>(-0.22 to 0.66)          | 0.23<br>(-0.21 to 0.67)   |
| <b>CRQ Dyspnea</b>                  | 5.68<br>(1.21)         | 0.23<br>(-0.032 to 0.49)   | 5.47<br>(1.29)            | 0.45<br>(0.18 to 0.71)      | 5.82<br>(1.08)    | 0.33<br>(0.062 to 0.59)  | -0.098<br>(-0.47 to 0.28)        | 0.12<br>(-0.26 to 0.49)   |
| <b>CSES Total</b>                   | 3.53<br>(1.0)          | -0.034<br>(-0.34 to 0.28)  | 3.67<br>(0.86)            | -0.36<br>(-0.66 to -0.053)  | 3.6<br>(0.92)     | 0.24<br>(-0.083 to 0.56) | -0.27<br>(-0.72 to 0.17)         | -0.60<br>(-1.04 to 0.15)  |
| <b>CSES Negative affect</b>         | 3.6<br>(0.92)          | -0.13<br>(-0.42 to 0.15)   | 3.51<br>(1.42)            | -0.29<br>(-0.57 to -0.0096) | 3.55<br>(0.84)    | 0.033<br>(-0.26 to 0.32) | -0.16<br>(-0.57 to 0.24)         | -0.32<br>(-0.73 to 0.082) |
| <b>CSES Emotional arousal</b>       | 3.67<br>(0.86)         | -0.21<br>(-0.50 to 0.094)  | 3.75<br>(0.8)             | -0.42<br>(-0.71 to -0.12)   | 3.69<br>(0.82)    | 0.18<br>(-0.13 to 0.49)  | -0.38<br>(-0.81 to 0.046)        | -0.59<br>(-1.02 to 0.17)  |
| <b>CSES Physical exertion</b>       | 3.01<br>(1.11)         | 0.062<br>(-0.23 to 0.36)   | 3.03<br>(1.01)            | -0.033<br>(-0.33 to 0.26)   | 2.93<br>(0.84)    | 0.32<br>(0.014 to 0.62)  | -0.26<br>(-0.68 to 0.17)         | -0.35<br>(-0.77 to 0.071) |
| <b>CSES Weather/environment</b>     | 3.26<br>(1.0)          | -0.0042<br>(-0.30 to 0.29) | 3.36<br>(0.79)            | -0.22<br>(-0.50 to 0.074)   | 3.26<br>(0.9)     | 0.27<br>(-0.034 to 0.57) | -0.27<br>(-0.69 to 0.15)         | -0.48<br>(-0.90 to 0.064) |
| <b>CSES Behavioral risk factors</b> | 3.34<br>(1.02)         | 0.025<br>(-0.29 to 0.34)   | 3.35<br>(0.91)            | -0.34<br>(-0.65 to -0.036)  | 3.47<br>(0.92)    | 0.10<br>(-0.21 to 0.42)  | -0.077<br>(-0.52 to 0.37)        | -0.44<br>(-0.88 to 0.028) |

*Abbreviations: CI = confidence interval; CRQ = Chronic Respiratory Questionnaire; CSES = COPD Self-Efficacy Scale*  
# generalized estimating equations (GEE) analysis with compound symmetry structure and covariates sex, age, education level, long-acting bronchodilator use, and inhaled corticosteroid use, and including data at all time points.
